# Supplementary material for: Facile synthesis of small Ag@AgCl nanoparticles via a vapor diffusion strategy and their highly efficient visible-light-driven photocatalytic performance
Source: Royal Society of Chemistry journal article supplement (doi:10.1039/c4cy00889h), 2014-07-29
Supplement: c4cy00889h1.pdf [file c4cy00889h1.pdf]

## Facile Synthesis of Small Ag@AgCl Nanoparticles via Vapor Diffusion Strategy and Their Highly Efficient Visible-Light-Driven Photocatalytic Performance

Zhikun Xu,<sup>a</sup> Lei Han,<sup>a,b</sup> Peng Hu,<sup>a,b</sup> and Shaojun Dong\*<sup>a,b</sup>

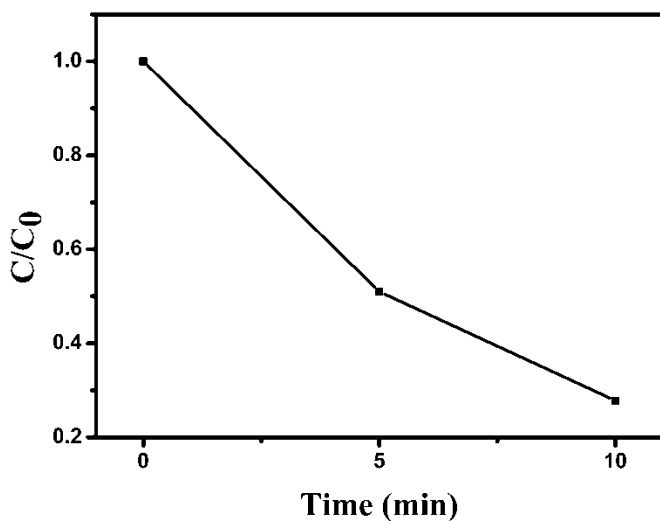

Figure S1. Visible light induced photocatalytic degradation efficiency of phenol.
